# Supplementary material
Source: Research Square preprint supplement (doi:10.21203/rs.3.rs-8489619/v1)
Supplement: Supplementary file 1 [file aab6148f30b74cfda5d605fb.docx]

**Table 1: Species richness, diversity indices and evenness of pollinators of different orders**

| **Sr. No.** | **Order** | **Species Richness (S)** | **Diversity Index (H')** | | **Evenness (E)** | | **Berger-Parker Dominance Index** | **Margalef Richness Index** | **Buzas and Gibson's Index** | **Gini Coefficient** |
| --- | --- | --- | --- | --- | --- | --- | --- | --- | --- | --- |
| **Shannon’s** | **Simpson’s** | **Shannon’s** | **Simpson’s** |
| 1. | Hymenoptera | 16 | 2.30 | 8.02 | 1.91 | 2.89 | 0.19 | 1.58 | 0.62 | 0.52 |
| 2. | Diptera | 11 | 2.13 | 6.94 | 1.77 | 2.89 | 0.22 | 1.21 | 0.77 | 0.39 |
| 3. | Lepidoptera | 10 | 2.08 | 6.94 | 1.73 | 2.99 | 0.19 | 1.39 | 0.79 | 0.36 |
| 4. | Coleoptera | 05 | 2.81 | 4.52 | 1.30 | 1.56 | 0.32 | 0.84 | 0.95 | 0.15 |
| 5. | Hemiptera | 04 | 2.09 | 3.37 | 1.06 | 1.28 | 0.39 | 0.62 | 0.90 | 0.23 |
